# Supplementary material for: Supplementary feeding of cattle-yak in the cold season alters rumen microbes, volatile fatty acids, and expression of SGLT1 in the rumen epithelium
Source: PeerJ. 2021 Mar 18;9:e11048. doi: 10.7717/peerj.11048 (PMC7982075; doi:10.7717/peerj.11048)
Supplement: Supplemental Information 1 [file peerj-09-11048-s001.xlsx]

## Sheet: Sheet1
Genus	G+S	G						Phylum	G+S	G
A2	0.000252916	0.000839562		Family	G+S	G		Actinobacteria	0.00848672	0.0205287
Acetitomaculum	0.00306309	0.00582277		Christensenellaceae	0.186595	0.279087		Bacteroidetes	0.436982	0.176687
Anaerofustis	0.000281017	0.000460405		Ruminococcaceae	0.192946	0.243121		Chloroflexi	0.00236055	0.00674358
Anaerovorax	0.00545174	0.00352075		Lachnospiraceae	0.1051	0.18595		Fibrobacteres	0.00393424	0.000839562
Arthrobacter	2.81017e-05	0.000189579		Rikenellaceae	0.200337	0.0687087		Firmicutes	0.525924	0.771233
Atopostipes	0.000140509	5.41653e-05		F082	0.118196	0.0545445		Kiritimatiellaeota	0.00632289	0.0038999
Blautia	0.00126458	0.00398115		Muribaculaceae	0.069889	0.0366158		Patescibacteria	0.00266966	0.00503737
Butyrivibrio_2	0.00800899	0.0118351		Prevotellaceae	0.0415344	0.0139205		Proteobacteria	0.00640719	0.00487488
CAG-352	0.000618238	0.000947893		Family_XIII	0.0163552	0.0254577		Spirochaetes	0.00191092	0.000866645
Candidatus_Saccharimonas	0.00264156	0.0048478		Erysipelotrichaceae	0.0064353	0.0173871		Tenericutes	0.00286638	0.00690608
Christensenellaceae_R-7_group	0.18564	0.278058		Acidaminococcaceae	0.0115217	0.00176037		WPS-2	0.00213573	0.00238327
Clostridium_sensu_stricto_1	0.000871154	0.00278951		Others	0.050836	0.0729065
Coprococcus_1	0.000281017	0.000568736		Unclassified	0.000252916	0.000541653
Coprococcus_2	0.000927357	0.00192287
Coriobacteriaceae_UCG-002	0.000112407	0.000135413
Corynebacterium_1	0.000955459	0.00400823
DNF00809	0.00233244	0.00308742
Defluviitaleaceae_UCG-011	0.000899255	0.00170621
Desulfovibrio	0.00604187	0.00270827
Enteractinococcus	0.000140509	0.000108331
Enterorhabdus	0.0016861	0.00308742
Erysipelotrichaceae_UCG-004	0.000252916	8.1248e-05
Erysipelotrichaceae_UCG-006	0.000618238	0.00205828
Erysipelotrichaceae_UCG-008	0.000590136	0.00192287
Facklamia	2.81017e-05	0.000189579
Family_XIII_AD3011_group	0.000786848	0.00227494
Family_XIII_UCG-001	0.000224814	0.00113747
Fibrobacter	0.00393424	0.000839562
Flaviflexus	0.000224814	5.41653e-05
Flexilinea	0.00236055	0.00674358
Howardella	2.81017e-05	0.000487488
Jeotgalicoccus	0.00016861	0.000568736
Lachnoclostridium	0.000758747	0.00200412
Lachnoclostridium_1	0.00222004	0.00723107
Lachnoclostridium_10	0.00222004	0.000379157
Lachnoclostridium_12	0.00016861	0.000162496
Lachnospiraceae_AC2044_group	0.0111002	0.0150038
Lachnospiraceae_FCS020_group	0.00444007	0.0028166
Lachnospiraceae_ND3007_group	0.000618238	0.000677066
Lachnospiraceae_NK3A20_group	0.00455248	0.00974976
Lachnospiraceae_NK4A136_group	0.000252916	0.00051457
Lachnospiraceae_UCG-002	0.00311929	0.00525404
Lachnospiraceae_UCG-006	0.000421526	0.000622901
Lachnospiraceae_UCG-008	0.00663201	0.0131893
Lachnospiraceae_UCG-010	0.00123648	0.000595818
Lachnospiraceae_XPB1014_group	0.0152311	0.0445781
Marvinbryantia	0.00179851	0.00403532
Mogibacterium	0.00238865	0.00460405
Moryella	0.0048054	0.0113206
Olsenella	0.00193902	0.00679775
Oribacterium	0.00126458	0.00251869
Paeniclostridium	0.000281017	0.00105622
Papillibacter	0.00831811	0.00235619
Prevotella_1	0.0187439	0.0067165
Prevotellaceae_NK3B31_group	0.0195588	0.00612068
Prevotellaceae_UCG-001	0.00278207	0.000947893
Prevotellaceae_UCG-003	0.000449628	0.000135413
Pseudobutyrivibrio	0.00581706	0.00696024
Rikenellaceae_RC9_gut_group	0.198342	0.0682754
Romboutsia	0.000393424	0.00211245
Roseburia	0.000252916	0.000731232
Ruminiclostridium	0.00064634	0.000460405
Ruminococcaceae_NK4A214_group	0.089785	0.110524
Ruminococcaceae_UCG-002	0.00016861	8.1248e-05
Ruminococcaceae_UCG-004	0.00303499	0.00779981
Ruminococcaceae_UCG-005	0.0081214	0.0138663
Ruminococcaceae_UCG-010	0.0130392	0.0102643
Ruminococcaceae_UCG-011	0.000927357	0.00170621
Ruminococcaceae_UCG-013	0.000252916	0.000677066
Ruminococcaceae_UCG-014	0.00387804	0.00709566
Ruminococcaceae_V9D2013_group	0.000702543	0.000541653
Ruminococcus_1	0.00736265	0.00863937
Ruminococcus_2	0.00120837	0.00352075
SP3-e08	0.00016861	5.41653e-05
Saccharofermentans	0.0343965	0.0510237
Salinicoccus	0.000112407	0.00040624
Shuttleworthia	0.00314739	0.0012458
Solobacterium	0.000252916	0.00108331
Staphylococcus	0.000112407	0.000622901
Streptococcus	0	0.000352075
Succiniclasticum	0.0115217	0.00176037
Syntrophococcus	0.00081495	0.00189579
Treponema_2	0.00191092	0.000866645
Turicibacter	0.000365322	0.00159788
U29-B03	0.00182661	0.000379157
Unclassified	0.000252916	0.000541653
Veillonellaceae_UCG-001	0.00137698	0.00138122
W5053	2.81017e-05	0.000297909
[Anaerorhabdus]_furcosa_group	0.00227624	0.0046853
[Eubacterium]_brachy_group	0.000196712	0.000243744
[Eubacterium]_coprostanoligenes_group	0.015203	0.0141101
[Eubacterium]_hallii_group	0.000562035	0.00111039
[Eubacterium]_nodatum_group	0.00705353	0.0130809
[Eubacterium]_ruminantium_group	0.00297878	0.00685191
[Eubacterium]_ventriosum_group	0.000281017	0.00092081
[Ruminococcus]_gauvreauii_group	0.00143319	0.00387282
probable_genus_10	0.00935788	0.00956018
uncultured_bacterium_c_Burkholderiales_bacterium_Beta_02	0.00132078	0.000649984
uncultured_bacterium_f_Atopobiaceae	0.00016861	0.000541653
uncultured_bacterium_f_Bacteroidales_BS11_gut_group	0.00399045	0.00181454
uncultured_bacterium_f_Bacteroidales_UCG-001	0.0015456	0.000460405
uncultured_bacterium_f_Bifidobacteriaceae	0.000505831	0.000704149
uncultured_bacterium_f_Carnobacteriaceae	8.43052e-05	0.000324992
uncultured_bacterium_f_Christensenellaceae	0.000955459	0.00102914
uncultured_bacterium_f_Clostridiales_vadinBB60_group	0.000337221	0.00040624
uncultured_bacterium_f_Coriobacteriales_Incertae_Sedis	5.62035e-05	0.000379157
uncultured_bacterium_f_Corynebacteriaceae	5.62035e-05	0.000297909
uncultured_bacterium_f_Eggerthellaceae	0.000281017	0.00113747
uncultured_bacterium_f_Erysipelotrichaceae	0.00207953	0.00595818
uncultured_bacterium_f_F082	0.118196	0.0545445
uncultured_bacterium_f_Family_XIII	0.000252916	0.000595818
uncultured_bacterium_f_Lachnospiraceae	0.00578896	0.00668942
uncultured_bacterium_f_Marinifilaceae	8.43052e-05	0.000108331
uncultured_bacterium_f_Marinilabiliaceae	0.000196712	0.000135413
uncultured_bacterium_f_Muribaculaceae	0.069889	0.0366158
uncultured_bacterium_f_Oligoflexaceae	0.000365322	0.00216661
uncultured_bacterium_f_Peptococcaceae	0.00115217	0.00400823
uncultured_bacterium_f_Planococcaceae	0.000702543	0.00173329
uncultured_bacterium_f_Ruminococcaceae	0.00528312	0.00950601
uncultured_bacterium_f_p-251-o5	0.00120837	0.000379157
uncultured_bacterium_o_Mollicutes_RF39	0.00261346	0.00636442
uncultured_bacterium_o_Saccharimonadales	2.81017e-05	0.000189579
uncultured_bacterium_o_WCHB1-41	0.00632289	0.0038999
uncultured_bacterium_p_WPS-2	0.00081495	0.00173329
