# Supplementary material for: Supplementary feeding of cattle-yak in the cold season alters rumen microbes, volatile fatty acids, and expression of SGLT1 in the rumen epithelium
Source: PeerJ. 2021 Mar 18;9:e11048. doi: 10.7717/peerj.11048 (PMC7982075; doi:10.7717/peerj.11048)
Supplement: Supplemental Information 5 [file peerj-09-11048-s005.xlsx]

## Sheet: Sheet1
	SGLT1	β-actin					Expression
	CT value	CT value	Average CT (β-actin)	△Ct	∆∆CT	2-∆∆CT	Average (2-∆∆CT)
G+S	28.6517	20.6854		7.82087	-0.0525856	1.03712
	28.4485	20.9585	20.8308	7.61767	-0.255785	1.19399	1.07704
	28.7043	20.8487		7.87346	0	1
G	26.3352	21.4796		5.50434	-2.36912	5.16624
	26.3132	21.5462	21.5604	5.48238	-2.39108	5.24548	5.55914
	26.0568	21.6554		5.22598	-2.64747	6.26569
